# Supplementary material for: The design, implementation, and effectiveness of intervention strategies aimed at improving genetic referral practices: a systematic review of the literature
Source: PubMed Central journal article supplement (PMC8629749; doi:10.1038/s41436-021-01272-0), 2021-08-24
Supplement: 41436_2021_1272_MOESM1_ESM.pdf [file 41436_2021_1272_MOESM1_ESM.pdf]

## Supplementary file 1. Search terms

| #  | Searches                                                                      |
|----|-------------------------------------------------------------------------------|
| 1  | (genetic clinic* adj3 (referral* or referred or referring)).tw.               |
| 2  | (genetic counsel* adj3 (referral* or referred or referring)).tw.              |
| 3  | (genetic service* adj3 (referral* or referred or referring)).tw.              |
| 4  | (genetic test* adj3 (referral* or referred or referring)).tw.                 |
| 5  | ((famil* or heredit* or inherit*) adj3 (counsel* or service* or clinic*)).tw. |
| 6  | exp genetic counseling/                                                       |
| 7  | exp genetic service/                                                          |
| 8  | genetic testing/ or genetic carrier screening/                                |
| 9  | (referral* or referred or referring).tw.                                      |
| 10 | 5 or 6 or 7 or 8                                                              |
| 11 | 9 and 10                                                                      |
| 12 | 1 or 2 or 3 or 4 or 11                                                        |
| 13 | limit 12 to english language                                                  |
| 14 | limit 13 to human                                                             |
| 15 | limit 14 to yr="1998 -Current"                                                |
| 16 | limit 15 to yr="1998 - 2010"                                                  |
| 17 | limit 15 to yr="2011 - 2015"                                                  |
| 18 | limit 15 to yr="2016 -Current"                                                |
| 19 | remove duplicates from 16                                                     |
| 20 | remove duplicates from 17                                                     |
| 21 | remove duplicates from 18                                                     |
| 22 | 19 or 20 or 21                                                                |

## Supplementary File 2 - PICO

What are the impacts of interventions aimed at improving patient referral to genetic services?

| Population                                              | Intervention                                                                                       | Comparator                                                                                                                                       | Outcomes                                                                                                                                                                                                                                                                                                                                                                                                                        |
|---------------------------------------------------------|----------------------------------------------------------------------------------------------------|--------------------------------------------------------------------------------------------------------------------------------------------------|---------------------------------------------------------------------------------------------------------------------------------------------------------------------------------------------------------------------------------------------------------------------------------------------------------------------------------------------------------------------------------------------------------------------------------|
| Health system<br>Health service<br>Health professionals | Any implementation intervention aimed at improving patient referral to specialist genetic services | Pre-intervention referral rates within same group; control group not exposed to intervention (e.g. standard practice); other active intervention | <i>Clinical outcomes:</i> <ul style="list-style-type: none"> <li>Changes in genetic referral rates</li> <li>Surrogate outcomes for referral (e.g. genetic attendance rates or genetic testing uptake)</li> </ul> <i>Implementation evaluation outcomes</i> <ul style="list-style-type: none"> <li>Proctor outcomes</li> </ul> <i>Cost-effectiveness:</i> <ul style="list-style-type: none"> <li>ICER/QALY/DALY/costs</li> </ul> |

\*\*Not required for intervention outcomes; DALY = disability-adjusted life year; ICER = incremental cost-effectiveness ratio; QALY = quality-adjusted life year

### Research sub-questions:

- To what extent are implementation theories and frameworks applied in the design of interventions aimed at improving referral to genetic services?
- To what extent is process evaluation data collected to explain intervention outcomes

### SELECTION CRITERIA

| Selection criteria | Inclusion criteria                                                                                                                                                                                                                                                                                                                                                                                                              | Exclusion criteria                                                                                                                                                                                                                                                 |
|--------------------|---------------------------------------------------------------------------------------------------------------------------------------------------------------------------------------------------------------------------------------------------------------------------------------------------------------------------------------------------------------------------------------------------------------------------------|--------------------------------------------------------------------------------------------------------------------------------------------------------------------------------------------------------------------------------------------------------------------|
| Study type         | Implementation intervention studies                                                                                                                                                                                                                                                                                                                                                                                             |                                                                                                                                                                                                                                                                    |
| Study design       | Studies with comparators: RCTs, cohort studies (concurrent or historical controls)<br><br>Qualitative studies or case series for implementation evaluation outcomes (Proctor outcomes)                                                                                                                                                                                                                                          | Studies lacking outcome data (e.g. protocols)<br>Studies lacking comparator                                                                                                                                                                                        |
| Setting            | Australia, NZ, Europe, Canada, USA (given similarities in genetic referral and testing guidelines)                                                                                                                                                                                                                                                                                                                              | Studies outside Australia, NZ, Europe, Canada, USA                                                                                                                                                                                                                 |
| Population         | Health system or service<br>Health professionals<br>Patients (where at least one intervention component targets a health professional group or health service/system).                                                                                                                                                                                                                                                          | Patient only interventions                                                                                                                                                                                                                                         |
| Intervention       | Implementation intervention or intervention with implementation intervention component designed to improve referral to genetic services                                                                                                                                                                                                                                                                                         | Interventions that do not contain an implementation intervention component (e.g. technical intervention only)<br>Mainstreaming interventions<br>Interventions not aimed at improving genetic referral<br>Interventions implemented before Jan 1 <sup>st</sup> 2000 |
| Comparator         | Standard/usual care<br>Another implementation intervention<br>Pre-intervention (baseline)                                                                                                                                                                                                                                                                                                                                       | No comparator - for health system, implementation or cost-effectiveness outcomes                                                                                                                                                                                   |
| Outcomes           | <i>Clinical outcomes:</i> <ul style="list-style-type: none"> <li>Changes in genetic referral rates</li> <li>Surrogate outcomes for referral (e.g. genetic attendance rates or genetic testing uptake)</li> </ul> <i>Implementation evaluation outcomes</i> <ul style="list-style-type: none"> <li>Proctor outcomes</li> </ul> <i>Cost-effectiveness:</i> <ul style="list-style-type: none"> <li>ICER/QALY/DALY/Costs</li> </ul> | No relevant health system or implementation evaluation outcomes                                                                                                                                                                                                    |
| Language           | English                                                                                                                                                                                                                                                                                                                                                                                                                         | Not in English                                                                                                                                                                                                                                                     |
| Publication period | From January 1 <sup>st</sup> 2000                                                                                                                                                                                                                                                                                                                                                                                               | Before January 1 <sup>st</sup> 2000                                                                                                                                                                                                                                |
| Publication type   | Journal article                                                                                                                                                                                                                                                                                                                                                                                                                 | Conference proceedings, protocols, comments, letters, news, editorials, narrative, rapid or scoping reviews, theses                                                                                                                                                |
